# Supplementary material for: Association between periodontal disease and systemic diseases: a cross-sectional analysis of current evidence
Source: PubMed Central journal article supplement (PMC11616297; doi:10.1186/s40779-024-00583-y), 2024-12-04
Supplement: 40779_2024_583_MOESM1_ESM.pdf [file 40779_2024_583_MOESM1_ESM.pdf]

**Table S1** Modified version of A Measurement Tool to Assess Systematic Reviews 2

**1. Did the research questions and inclusion criteria for the review include the key components of the focused theme?**

For example, systematic reviews that include case control studies, cohort studies, cross-sectional studies of the association of certain exposure factors and relevant outcomes.

For Yes:

- population
- exposure factors
- comparator
- outcomes

- Yes
- No

**2. Did the report of the review contain an explicit statement that the review methods were established prior to the conduct of the review and did the report justify any significant deviations from the protocol?**

For Partial Yes:

The authors state that they had a written protocol or guide that included ALL the following:

- review question(s)
- a search strategy
- inclusion/exclusion criteria
- a risk of bias assessment

- Yes
- Partial Yes
- No

For Yes:

As for Partial Yes, plus the protocol should be registered and should also have specified:

- a meta-analysis/synthesis plan, if appropriate, and
- a plan for investigating causes of heterogeneity
- justification for any deviations from the protocol

**3. Did the review authors explain their selection of the study designs for inclusion in the review?**

For Yes, the review should satisfy the following:

- explanation for including only cross-sectional studies
- or explanation for including only case control studies
- or explanation for including only cohort studies
- or explanation for including two or more of cross-sectional studies, case control studies, cohort studies

- Yes
- No

**4. Did the review authors use a comprehensive literature search strategy?**

For Partial Yes (ALL the following):

- |                                                                                        |                                      |
|----------------------------------------------------------------------------------------|--------------------------------------|
| <input type="checkbox"/> searched at least 2 databases (relevant to research question) | <input type="checkbox"/> Yes         |
| <input type="checkbox"/> provided key word and/or search strategy                      | <input type="checkbox"/> Partial Yes |
| <input type="checkbox"/> justified publication restrictions (eg, language)             | <input type="checkbox"/> No          |

For Yes, should also have (ALL the following):

- searched the reference lists / bibliographies of included studies
- searched trial/study registries
- included/consulted content experts in the field where relevant, searched for grey literature
- conducted search within 24 months of completion of the review

**5. Did the review authors perform study selection in duplicate?**

For Yes, either ONE of the following:

- |                                                                                                                                                                              |                              |
|------------------------------------------------------------------------------------------------------------------------------------------------------------------------------|------------------------------|
| <input type="checkbox"/> at least 2 reviewers independently agreed on selection of eligible studies and achieved consensus on which studies to include                       | <input type="checkbox"/> Yes |
| <input type="checkbox"/> OR 2 reviewers selected a sample of eligible studies and achieved good agreement (at least 80 percent), with the remainder selected by one reviewer | <input type="checkbox"/> No  |

**6. Did the review authors perform data extraction in duplicate?**

For Yes, either ONE of the following:

- |                                                                                                                                                                                          |                              |
|------------------------------------------------------------------------------------------------------------------------------------------------------------------------------------------|------------------------------|
| <input type="checkbox"/> at least 2 reviewers achieved consensus on which data to extract from included studies                                                                          | <input type="checkbox"/> Yes |
| <input type="checkbox"/> OR 2 reviewers extracted data from a sample of eligible studies and achieved good agreement (at least 80 percent), with the remainder extracted by one reviewer | <input type="checkbox"/> No  |

**7. Did the review authors provide a list of excluded studies and justify the exclusions?**

For Partial Yes:

- |                                                                                                                                            |                                      |
|--------------------------------------------------------------------------------------------------------------------------------------------|--------------------------------------|
| <input type="checkbox"/> provided a list of all potentially relevant studies that were read in full-text form but excluded from the review | <input type="checkbox"/> Yes         |
|                                                                                                                                            | <input type="checkbox"/> Partial Yes |
|                                                                                                                                            | <input type="checkbox"/> No          |

For Yes, must also have:

- justified the exclusion from the review of each potentially relevant study

**8. Did the review authors describe the included studies in adequate detail?**

For Partial Yes (ALL the following):

- |                                                     |                                      |
|-----------------------------------------------------|--------------------------------------|
| <input type="checkbox"/> described populations      | <input type="checkbox"/> Yes         |
| <input type="checkbox"/> described exposure factors | <input type="checkbox"/> Partial Yes |
| <input type="checkbox"/> described comparators      | <input type="checkbox"/> No          |
| <input type="checkbox"/> described outcomes         |                                      |
| <input type="checkbox"/> described research designs |                                      |

For Yes, should also have ALL the following:

- described population in detail
- described exposure factors in detail
- described comparators in detail
- described study's setting

**9. Did the review authors use a satisfactory technique for assessing the risk of bias in individual studies that were included in the review?**

**Cohort studies**

For Partial Yes, must have assessed:

- from confounding, and
- from selection bias

- Yes
- Partial Yes
- No

For Yes, must also have assessed:

- methods used to ascertain exposure and outcomes, and
- adequate follow up period for outcome of interest
- record linkage of independent blind assessment of outcome
- adequacy of follow up of cohorts (complete follow up/subjects lost to follow up unlikely to introduce bias)

**Case control studies**

For Partial Yes, must have assessed:

- from confounding, and
- from selection bias

- Yes
- Partial Yes
- No

For Yes, must also have assessed:

- methods used to ascertain exposures and outcomes, and
- same method of ascertainment exposures for both groups
- same non-response rate for both groups

**Cross-sectional studies**

For Partial Yes, must have assessed:

- from confounding, and
- from selection bias

- Yes
- Partial Yes
- No

For Yes, must also have assessed:

- methods used to ascertain exposures and outcomes, and
- appropriate statistical analysis used

**10. Did the review authors report on the sources of funding for the studies included in the review?**

For Yes:

- must have reported on the sources of funding for individual studies included in the review

- Yes
- No

Note: reporting that the reviewers looked for this information but it was not reported by study authors also qualifies

**11. If meta-analysis was performed did the review authors use appropriate methods for statistical combination of results?**

For Yes:

- |                                                                                                                                              |                                                     |
|----------------------------------------------------------------------------------------------------------------------------------------------|-----------------------------------------------------|
| <input type="checkbox"/> the authors justified combining the data in a meta-analysis                                                         | <input type="checkbox"/> Yes                        |
| <input type="checkbox"/> and they used an appropriate weighted technique to combine study results and adjusted for heterogeneity if present. | <input type="checkbox"/> No                         |
| <input type="checkbox"/> and investigated the causes of any heterogeneity                                                                    | <input type="checkbox"/> No meta-analysis conducted |

**12. If meta-analysis was performed, did the review authors assess the potential impact of risk of bias in individual studies on the results of the meta-analysis or other evidence synthesis?**

For Yes:

- |                                                                                                                                                                                                                            |                                                     |
|----------------------------------------------------------------------------------------------------------------------------------------------------------------------------------------------------------------------------|-----------------------------------------------------|
| <input type="checkbox"/> included only low risk of bias individual studies                                                                                                                                                 | <input type="checkbox"/> Yes                        |
| <input type="checkbox"/> or, if the pooled estimate was based on individual studies at variable risk of bias, the authors performed analyses to investigate possible impact of risk of bias on summary estimates of effect | <input type="checkbox"/> No                         |
|                                                                                                                                                                                                                            | <input type="checkbox"/> No meta-analysis conducted |

**13. Did the review authors account for risk of bias in individual studies when interpreting/discussing the results of the review?**

For Yes:

- |                                                                                                                                                                  |                              |
|------------------------------------------------------------------------------------------------------------------------------------------------------------------|------------------------------|
| <input type="checkbox"/> included only low risk of bias individual studies                                                                                       | <input type="checkbox"/> Yes |
| <input type="checkbox"/> or, if individual studies with moderate or high risk of bias, provided a discussion of the likely impact of risk of bias on the results | <input type="checkbox"/> No  |

**14. Did the review authors provide a satisfactory explanation for, and discussion of, any heterogeneity observed in the results of the review?**

For Yes:

- |                                                                                                                                                                                                              |                              |
|--------------------------------------------------------------------------------------------------------------------------------------------------------------------------------------------------------------|------------------------------|
| <input type="checkbox"/> there was no significant heterogeneity in the results                                                                                                                               | <input type="checkbox"/> Yes |
| <input type="checkbox"/> or if heterogeneity was present the authors performed an investigation of sources of any heterogeneity in the results and discussed the impact of this on the results of the review | <input type="checkbox"/> No  |

**15. If they performed quantitative synthesis did the review authors carry out an adequate investigation of publication bias (small study bias) and discuss its likely impact on the results of the review?**

For Yes:

- |                                                                                                                                                    |                                                     |
|----------------------------------------------------------------------------------------------------------------------------------------------------|-----------------------------------------------------|
| <input type="checkbox"/> performed graphical or statistical tests for publication discussed likelihood and magnitude of impact of publication bias | <input type="checkbox"/> Yes                        |
|                                                                                                                                                    | <input type="checkbox"/> No                         |
|                                                                                                                                                    | <input type="checkbox"/> No meta-analysis conducted |

**16. Did the review authors report any potential sources of conflict of interest, including any funding they received for conducting the review?**

For Yes:

- |                                                                                                                           |                              |
|---------------------------------------------------------------------------------------------------------------------------|------------------------------|
| <input type="checkbox"/> the authors reported no competing interests or                                                   | <input type="checkbox"/> Yes |
| <input type="checkbox"/> the authors described their funding sources and how they managed potential conflicts of interest | <input type="checkbox"/> No  |

**Table S2** Summary of basic information of included studies

| <b>Study</b>                       | <b>Country</b> | <b>Journal</b>                | <b>Study population</b>                 | <b>Number of included studies</b> | <b>Exposure (periodontal disease)</b> | <b>Outcome (systemic disease)</b>                                        | <b>Conclusion</b>                                                                                  |
|------------------------------------|----------------|-------------------------------|-----------------------------------------|-----------------------------------|---------------------------------------|--------------------------------------------------------------------------|----------------------------------------------------------------------------------------------------|
| Chen et al. 2024 [1]               | China          | Med Oral Patol Oral Cir Bucal | End-stage renal disease (ESRD) patients | 8                                 | Periodontitis                         | Cardiovascular mortality, all-cause mortality                            | Periodontitis does not impact all-cause and cardiovascular mortality in ESRD patients              |
| Dewan et al. 2024 [2]              | India          | Dent Med Probl                | Adults                                  | 13                                | Periodontitis and gingivitis          | Stroke (ischemic stroke, hemorrhagic stroke, transient ischemic attacks) | A significant association between stroke and periodontal disease                                   |
| Ma et al. 2024 [3]                 | China          | BMC Oral Health               | Human                                   | 73                                | Periodontitis                         | Dyslipidemia                                                             | Periodontal disease is a risk factor for high triglyceride and low high-density lipoprotein levels |
| Aguiar et al. 2024 [4]             | Brazil         | Clinics                       | Human                                   | 9                                 | Periodontal disease                   | Gastric adenocarcinoma                                                   | The presence of periodontal disease increased the risk of gastric adenocarcinoma                   |
| Li et al. 2024 [5]                 | China          | Clin Oral Investig            | Human                                   | 18                                | Periodontitis                         | Dental caries (crown caries, root caries)                                | A positive correlation between dental caries and periodontitis clinically                          |
| Lin et al. 2024 [6]                | China          | Dement Geriatr Cogn Disord    | Adults                                  | 7                                 | Periodontitis                         | Mild cognitive impairment                                                | Patients with periodontitis are at a higher risk of developing mild cognitive impairment           |
| Ma et al. 2024 [7]                 | China          | Acta Odontol Scand            | Human                                   | 16                                | Periodontitis                         | Oral cancer                                                              | Periodontitis may serve as a potential risk factor for oral cancer                                 |
| Wang et al. 2024 [8]               | China          | Clin Oral Investig            | Human                                   | 9                                 | Periodontitis                         | Halitosis                                                                | A positive association was observed between halitosis and periodontitis                            |
| Rosário-Dos-Santos et al. 2023 [9] | Brazil         | Oral Dis                      | Adults                                  | 14                                | Periodontitis                         | Metabolic syndrome                                                       | Moderate and severe levels of periodontitis are associated with metabolic syndrome                 |
| Leelaviwat et al. 2023 [10]        | USA            | J Arrhythm                    | Human                                   | 4                                 | Periodontal disease                   | Atrial fibrillation or atrial flutter                                    | Periodontal disease increases the risk of atrial fibrillation and atrial flutter                   |

| <b>Study</b>                             | <b>Country</b> | <b>Journal</b>                | <b>Study population</b>                                  | <b>Number of included studies</b> | <b>Exposure (periodontal disease)</b>  | <b>Outcome (systemic disease)</b>                                                                     | <b>Conclusion</b>                                                                                                                                 |
|------------------------------------------|----------------|-------------------------------|----------------------------------------------------------|-----------------------------------|----------------------------------------|-------------------------------------------------------------------------------------------------------|---------------------------------------------------------------------------------------------------------------------------------------------------|
| Larvin et al. 2023 [11] <sup>a</sup>     | UK             | Age Ageing                    | Human                                                    | 39                                | Periodontal disease                    | Cognitive disorders (dementia and Alzheimer's disease, cognitive decline)                             | Periodontal disease demonstrated increased risks of cognitive disorders                                                                           |
| Molina et al. 2023 [12]                  | Spain          | J Clin Periodontol            | Adults                                                   | 75                                | Periodontitis                          | Respiratory diseases [asthma, severe acute respiratory syndrome coronavirus 2 (SARS CoV-2) infection] | A positive association between periodontitis and coronavirus disease 2019 (COVID-19) complications has been found, but not for asthma             |
| Larvin et al. 2023 [13] <sup>b</sup>     | UK             | Community Dent Oral Epidemiol | Populations without predefined systemic disease          | 30                                | Periodontitis                          | Immune-mediated systemic conditions (osteoporosis, liver disease)                                     | The risks of developing subsequent liver disease and osteoporosis are significantly increased, though the evidence for the associations is scarce |
| Ortíz de Urbina Comerón et al. 2023 [14] | Spain          | J Clin Med                    | Men                                                      | 7                                 | Periodontal disease                    | Prostate inflammation                                                                                 | The incidence of periodontal disease does not increase the risk of the incidence of prostate inflammation                                         |
| Yang et al. 2023 [15]                    | China          | BMJ Open                      | Adults                                                   | 22                                | Periodontal disease                    | Chronic obstructive pulmonary disease (COPD), COPD-related acute exacerbation or mortality            | Periodontal disease confers no risk for COPD and COPD-related events when strictly adjusted by smoking                                            |
| Guo et al. 2023 [16]                     | China          | PLoS One                      | Adults free of cardiovascular disease (CVD) at initially | 39                                | Moderate or severe periodontal disease | Cardiovascular outcome (coronary heart disease, stroke, cardiac death), all-cause mortality           | Periodontal disease were associated with an increased risk of coronary heart disease, stroke, cardiac death, and all-cause mortality              |
| Xu et al. 2023 [17]                      | China          | Community Dent Health         | Human                                                    | 7                                 | Periodontitis                          | Non-alcoholic fatty liver disease                                                                     | Current evidence fails to demonstrate a link between periodontitis and non-alcoholic fatty liver disease                                          |

| Study                      | Country | Journal           | Study population | Number of included studies | Exposure (periodontal disease) | Outcome (systemic disease)                                                                                                              | Conclusion                                                                                                                                                                                                                                           |
|----------------------------|---------|-------------------|------------------|----------------------------|--------------------------------|-----------------------------------------------------------------------------------------------------------------------------------------|------------------------------------------------------------------------------------------------------------------------------------------------------------------------------------------------------------------------------------------------------|
| Karimi et al. 2023 [18]    | Iran    | Health Sci Rep    | Pregnant women   | 67                         | Periodontal disease            | Adverse maternal or neonatal outcomes (pre-eclampsia, premature rupture of the amniotic sac, gestational diabetes, low weight at birth) | Periodontal disease may contribute to a higher risk of poor maternal and newborn outcomes in pregnant women                                                                                                                                          |
| Khodadadi et al. 2022 [19] | Iran    | J Clin Exp Dent   | Adults           | 10                         | Periodontitis                  | Obstructive sleep apnea (OSA)                                                                                                           | Periodontitis has a direct association with OSA. Periodontitis has been shown to be associated with mild-to-moderate OSA, but not with severe OSA                                                                                                    |
| Zhang et al. 2022 [20]     | China   | Front Pediatr     | Pregnant women   | 24                         | Periodontal disease            | Adverse neonatal outcome (preterm birth, small for gestational age)                                                                     | Pregnant women with periodontal disease have a significantly higher risk of preterm birth. No relationship between periodontal disease and small for gestational age                                                                                 |
| Zhang et al. 2022 [21]     | China   | Oral Dis          | Adults           | 13                         | Periodontitis                  | Psoriasis                                                                                                                               | A positive association between periodontitis and psoriasis                                                                                                                                                                                           |
| Wang et al. 2022 [22]      | China   | PeerJ             | Human            | 27                         | Periodontal disease            | Cancer (breast, prostate, colon and rectum)                                                                                             | A modest association between periodontal disease and breast, prostate, colon and rectum cancer incidence. Periodontal disease may increase the risk of breast, prostate, colon and rectum cancer mortality, the overall estimate was not significant |
| Li et al. 2022 [23]        | China   | Front Oncol       | Adults           | 11                         | Periodontal disease            | Urogenital cancer                                                                                                                       | Periodontal disease is a potential risk factor for urogenital cancer                                                                                                                                                                                 |
| Kesharani et al. 2022 [24] | India   | Contemp Clin Dent | Human            | 12                         | Periodontitis                  | Lung cancer                                                                                                                             | Periodontal disease is a potential risk factor for the development of lung cancer                                                                                                                                                                    |

| <b>Study</b>                  | <b>Country</b> | <b>Journal</b>                  | <b>Study population</b>                                      | <b>Number of included studies</b> | <b>Exposure (periodontal disease)</b> | <b>Outcome (systemic disease)</b>                                               | <b>Conclusion</b>                                                                                                                       |
|-------------------------------|----------------|---------------------------------|--------------------------------------------------------------|-----------------------------------|---------------------------------------|---------------------------------------------------------------------------------|-----------------------------------------------------------------------------------------------------------------------------------------|
| Kaliamoorthy et al. 2022 [25] | India          | Med Pharm Rep                   | Adults                                                       | 5                                 | Periodontitis                         | Alzheimer's disease (Alzheimer's disease or cognitive impairment)               | A significant association between periodontitis and Alzheimer's disease                                                                 |
| Romandini et al. 2021 [26]    | Spain          | J Dent Res                      | Human                                                        | 57                                | Periodontitis                         | Mortality (cancer, coronary heart disease, cerebrovascular diseases, pneumonia) | Periodontitis is associated with an increased risk of all-cause and cause-specific mortality, but not for pneumonia                     |
| Larvin et al. 2021 [27]       | UK             | Clin Exp Dent Res               | Population free from predefined systemic disease at baseline | 32                                | Periodontal disease                   | CVD                                                                             | Modest but consistently increased risk of CVD in periodontal disease populations                                                        |
| Qin et al. 2021 [28]          | China          | AM J EMERG MED                  | Not defined                                                  | 10                                | Periodontal disease                   | Myocardial infarction                                                           | Periodontal disease is modestly associated with myocardial infarction, especially in women                                              |
| Guo et al. 2021 [29]          | China          | Int J Environ Res Public Health | Human                                                        | 20                                | Periodontitis                         | Dementia                                                                        | No statistical significance in the effect of periodontitis on dementia. Moderate or severe periodontitis was a risk factor for dementia |
| Alvarenga et al. 2021 [30]    | Brazil         | Front Public Health             | Humans with diabetes mellitus                                | 5                                 | Periodontitis                         | Diabetic retinopathy                                                            | An association between diabetic retinopathy and periodontitis, however, the quality of the body of evidence was low                     |
| Stöhr et al. 2021 [31]        | Germany        | Sci Rep                         | Humans, except pregnant women, children and adolescents      | 15                                | Periodontal disease                   | Diabetes mellitus                                                               | A positive bidirectional association between periodontal disease and diabetes mellitus                                                  |
| Sayeed et al. 2021 [32]       | Saudi Arabia   | J INT SOC PREV COMMU            | Female                                                       | 37                                | Periodontal disease                   | Metabolic syndrome                                                              | Lack of convincing proof of a link between metabolic syndrome and periodontal disease in females                                        |



| <b>Study</b>                 | <b>Country</b> | <b>Journal</b>                | <b>Study population</b>             | <b>Number of included studies</b> | <b>Exposure (periodontal disease)</b> | <b>Outcome (systemic disease)</b>                                                                    | <b>Conclusion</b>                                                                                    |
|------------------------------|----------------|-------------------------------|-------------------------------------|-----------------------------------|---------------------------------------|------------------------------------------------------------------------------------------------------|------------------------------------------------------------------------------------------------------|
| Aragão et al. 2021 [33]      | Brazil         | Front Psychiatry              | Adults                              | 11                                | Periodontitis                         | Anxiety                                                                                              | Positive association between periodontitis and anxiety, although with very low certainty of evidence |
| Farook et al. 2021 [34]      | Saudi Arabia   | Am J Mens Health              | Adult males                         | 6                                 | Periodontitis                         | Erectile dysfunction                                                                                 | A significant association exists between the periodontal disease and erectile dysfunction            |
| Wu et al. 2020 [35]          | China          | Med Oral Patol Oral Cir Bucal | Patients of any age                 | 6                                 | Periodontitis                         | Hematopoietic and lymphatic cancers                                                                  | Periodontal disease might be considered as a risk factor for hematopoietic and lymphatic cancers     |
| Zhang et al. 2020 [36]       | China          | J Clin Periodontol            | Human                               | 10                                | Periodontitis                         | Gastrointestinal cancers                                                                             | Periodontitis may be a risk factor for gastrointestinal cancers                                      |
| Gopinath et al. 2020 [37]    | Malaysia       | Cancers                       | Human                               | 21                                | Periodontal disease                   | Head and neck cancer                                                                                 | Periodontal disease is an independent risk factor for head and neck cancer                           |
| Nguyen et al. 2020 [38]      | Australia      | Diabetes Res Clin Pract       | Participants with diabetes mellitus | 14                                | Periodontal disease                   | Complications of diabetes mellitus (neuropathy, nephropathy, cardiovascular complications and death) | A link between poor oral health and diabetes mellitus and its complications                          |
| Gomes-Filho et al. 2020 [39] | Brazil         | Oral Dis                      | Adults                              | 13                                | Periodontitis                         | Respiratory diseases (pneumonia)                                                                     | An association between periodontitis and pneumonia                                                   |
| Lv et al. 2020 [40]          | China          | Biomed Res Int                | Human                               | 5                                 | Periodontal disease                   | Age-related macular degeneration                                                                     | Periodontal disease patients have a higher risk of age-related macular degeneration                  |
| Qiao et al. 2020 [41]        | China          | Joint Bone Spine              | Human                               | 13                                | Periodontitis                         | Rheumatoid arthritis                                                                                 | An increased risk of rheumatoid arthritis in patients with periodontitis                             |

| <b>Study</b>                   | <b>Country</b> | <b>Journal</b>             | <b>Study population</b>          | <b>Number of included studies</b> | <b>Exposure (periodontal disease)</b> | <b>Outcome (systemic disease)</b>                                      | <b>Conclusion</b>                                                                                                                                                       |
|--------------------------------|----------------|----------------------------|----------------------------------|-----------------------------------|---------------------------------------|------------------------------------------------------------------------|-------------------------------------------------------------------------------------------------------------------------------------------------------------------------|
| Hussain et al. 2020 [42]       | UK             | Semin Arthritis Rheum      | Adults with rheumatoid arthritis | 6                                 | Periodontitis                         | Rheumatoid arthritis (clinical activity)                               | Periodontal disease is associated with worse rheumatoid arthritis clinical activity                                                                                     |
| Ali et al. 2020 [43]           | Australia      | J Public Health            | Human                            | 13                                | Periodontitis                         | Oral human papillomavirus (HPV) infection                              | A positive association between periodontitis and oral HPV infection. Evidence for an association between periodontitis and high-risk oral HPV infection is inconclusive |
| Xu et al. 2020 [44]            | China          | Clin Exp Pharmacol Physiol | Human                            | 29                                | Periodontitis                         | Hyperlipidaemia                                                        | Periodontal disease is indeed associated with hyperlipidemia in humans                                                                                                  |
| Aguilera et al. 2020 [45]      | UK             | Cardiovasc Res             | Individuals ( $\geq 16$ years)   | 81                                | Periodontitis                         | Hypertension                                                           | Periodontitis could be associated with increased risk of hypertension in a linear fashion                                                                               |
| Machado et al. 2020 [46]       | Portugal       | J Clin Med                 | Female patients                  | 12                                | Periodontitis                         | Polycystic ovary syndrome                                              | A higher risk of individuals with polycystic ovary syndrome being diagnosed with periodontal disease                                                                    |
| Gobin et al. 2020 [47]         | China          | Front Endocrinol           | Adults                           | 43                                | Periodontal disease                   | Metabolic syndrome                                                     | Compelling evidence for the association between periodontitis and metabolic syndrome                                                                                    |
| Lorenzo-Pouso et al. 2020 [48] | Spain          | Acta Odontol Scand         | Patients                         | 9                                 | Periodontal disease                   | Inflammatory bowel disease                                             | Clear evidence for an association between periodontal disease and inflammatory bowel disease                                                                            |
| Ma et al. 2020 [49]            | China          | Int J Med Sci              | Human                            | 10                                | Periodontitis                         | Cancer (esophageal cancer, hematological malignancy, melanoma of skin) | A potential link between periodontitis and esophageal cancer, hematological malignancy, and melanoma of the skin                                                        |
| Wu et al. 2020 [50]            | China          | BMC Oral Health            | Human                            | 53                                | Periodontitis                         | Type 2 diabetes mellitus (T2DM)                                        | An evident bidirectional relationship between T2DM and periodontitis                                                                                                    |

| <b>Study</b>                 | <b>Country</b> | <b>Journal</b>  | <b>Study population</b> | <b>Number of included studies</b> | <b>Exposure (periodontal disease)</b> | <b>Outcome (systemic disease)</b>                                                                             | <b>Conclusion</b>                                                                                    |
|------------------------------|----------------|-----------------|-------------------------|-----------------------------------|---------------------------------------|---------------------------------------------------------------------------------------------------------------|------------------------------------------------------------------------------------------------------|
| Kapellas et al. 2019 [51]    | Australia      | Nephrology      | Adults                  | 17                                | Periodontal disease                   | Chronic kidney disease                                                                                        | Moderate evidence for a positive association between periodontitis and chronic kidney disease exists |
| Ferreira et al. 2018 [52]    | Brazil         | J Dent          | Human                   | 19                                | Periodontitis                         | Peri-implantitis                                                                                              | Diagnosis or history of periodontitis was associated with the occurrence of peri-implantitis         |
| Xie et al. 2018 [53]         | China          | Front Physiol   | Human                   | 5                                 | Periodontal disease                   | Bladder cancer                                                                                                | Patients with periodontal disease may not be at an increased risk of developing bladder cancer       |
| Corbella et al. 2018 [54]    | Italy          | PLoS One        | Human                   | 10                                | Periodontitis                         | Cancer (digestive tract cancer, corpus uteri cancer, esophagus or oropharyngeal cancer, non-Hodgkin lymphoma) | A low but statistically significant association between periodontitis and different types of cancer  |
| Leira et al. 2017 [55]       | Spain          | Eur J Epidemiol | Adults                  | 8                                 | Periodontitis                         | Ischemic stroke                                                                                               | An association between periodontitis and ischemic stroke                                             |
| Maisonneuve et al. 2017 [56] | USA            | Ann Oncol       | Human                   | 8                                 | Periodontitis                         | Pancreatic cancer                                                                                             | An association between periodontal disease and subsequent tooth loss with pancreatic cancer          |
| Zeng et al. 2016 [57]        | China          | Int J Cardiol   | Human                   | 15                                | Periodontal disease                   | Carotid atherosclerosis                                                                                       | Periodontal disease was associated with carotid atherosclerosis                                      |

<sup>a,b</sup> Different studies published by the same author in the same year. ESRD end-stage renal disease, SARS-CoV-2 severe acute respiratory syndrome coronavirus 2, COVID-19 coronavirus disease 2019, COPD chronic obstructive pulmonary disease, CVD cardiovascular disease, OSA obstructive sleep apnea, HPV human papillomavirus, T2DM type 2 diabetes mellitus

**Table S3** Detailed evaluation of the methodological quality with modified version of A Measurement Tool to Assess Systematic Reviews 2

| Study                                    | Q1 | Q2 | Q3 | Q4 | Q5 | Q6 | Q7 | Q8 | Q9 | Q10 | Q11 | Q12 | Q13 | Q14 | Q15 | Q16 | All            |
|------------------------------------------|----|----|----|----|----|----|----|----|----|-----|-----|-----|-----|-----|-----|-----|----------------|
| Chen et al. 2024 [1]                     | Y  | PY | N  | PY | Y  | Y  | N  | Y  | Y  | N   | Y   | N   | N   | N   | Y   | Y   | Critically low |
| Dewan et al. 2024 [2]                    | Y  | PY | N  | PY | N  | Y  | N  | Y  | PY | N   | N   | N   | Y   | Y   | N   | Y   | Critically low |
| Ma et al. 2024 [3]                       | Y  | N  | N  | PY | Y  | N  | N  | Y  | Y  | N   | Y   | N   | N   | Y   | Y   | Y   | Critically low |
| Aguiar et al. 2024 [4]                   | Y  | PY | N  | PY | Y  | Y  | N  | Y  | Y  | N   | N   | N   | Y   | N   | Y   | Y   | Critically low |
| Li et al. 2024 [5]                       | Y  | N  | N  | PY | N  | Y  | N  | Y  | Y  | N   | Y   | N   | N   | N   | Y   | Y   | Critically low |
| Lin et al. 2024 [6]                      | Y  | PY | N  | PY | Y  | N  | N  | Y  | Y  | N   | N   | N   | N   | Y   | N   | Y   | Critically low |
| Ma et al. 2024 [7]                       | Y  | PY | N  | PY | Y  | N  | N  | Y  | Y  | N   | Y   | N   | N   | Y   | Y   | Y   | Critically low |
| Wang et al. 2024 [8]                     | Y  | PY | N  | PY | Y  | N  | N  | Y  | PY | N   | N   | N   | Y   | Y   | N   | Y   | Critically low |
| Rosário-Dos-Santos et al. 2023 [9]       | Y  | PY | N  | PY | Y  | Y  | Y  | Y  | PY | N   | Y   | N   | Y   | Y   | Y   | Y   | Moderate       |
| Leelaviwat et al. 2023 [10]              | Y  | N  | N  | PY | N  | N  | N  | Y  | N  | N   | N   | N   | N   | N   | N   | Y   | Critically low |
| Larvin et al. 2023 [11] <sup>a</sup>     | Y  | PY | N  | PY | N  | N  | N  | PY | PY | N   | Y   | N   | Y   | Y   | Y   | Y   | Low            |
| Molina et al. 2023 [12]                  | Y  | PY | N  | PY | Y  | Y  | Y  | Y  | Y  | Y   | N   | N   | Y   | Y   | Y   | Y   | Low            |
| Larvin et al. 2023 [13] <sup>b</sup>     | Y  | PY | N  | PY | Y  | Y  | Y  | PY | PY | N   | Y   | N   | Y   | Y   | Y   | Y   | Moderate       |
| Ortíz de Urbina Comerón et al. 2023 [14] | Y  | N  | N  | PY | Y  | Y  | N  | PY | Y  | N   | N   | N   | Y   | N   | Y   | Y   | Critically low |
| Yang et al. 2023 [15]                    | Y  | N  | N  | PY | Y  | Y  | N  | PY | PY | N   | Y   | N   | Y   | Y   | Y   | Y   | Critically low |
| Guo et al. 2023 [16]                     | Y  | N  | N  | PY | Y  | Y  | N  | PY | Y  | N   | Y   | Y   | Y   | Y   | Y   | Y   | Critically low |
| Xu et al. 2023 [17]                      | Y  | PY | N  | PY | Y  | Y  | N  | PY | PY | N   | Y   | N   | N   | Y   | Y   | Y   | Critically low |
| Karimi et al. 2023 [18]                  | Y  | N  | N  | PY | Y  | Y  | N  | Y  | Y  | N   | N   | N   | Y   | N   | Y   | Y   | Critically low |
| Khodadadi et al. 2022 [19]               | Y  | N  | N  | PY | Y  | Y  | N  | PY | Y  | N   | Y   | N   | N   | Y   | Y   | Y   | Critically low |

| Study                         | Q1 | Q2 | Q3 | Q4 | Q5 | Q6 | Q7 | Q8 | Q9 | Q10 | Q11 | Q12 | Q13 | Q14 | Q15 | Q16 | All            |
|-------------------------------|----|----|----|----|----|----|----|----|----|-----|-----|-----|-----|-----|-----|-----|----------------|
| Zhang et al. 2022 [20]        | Y  | N  | N  | PY | Y  | Y  | N  | Y  | Y  | N   | Y   | N   | N   | Y   | Y   | Y   | Critically low |
| Zhang et al. 2022 [21]        | Y  | PY | N  | PY | Y  | Y  | N  | Y  | Y  | N   | Y   | N   | Y   | Y   | N   | Y   | Critically low |
| Wang et al. 2022 [22]         | Y  | PY | N  | PY | Y  | Y  | N  | Y  | Y  | N   | Y   | N   | Y   | Y   | Y   | Y   | Low            |
| Li et al. 2022 [23]           | Y  | PY | N  | PY | Y  | N  | Y  | Y  | Y  | N   | Y   | Y   | Y   | Y   | Y   | Y   | Moderate       |
| Kesharani et al. 2022 [24]    | Y  | PY | N  | PY | N  | N  | N  | Y  | Y  | N   | Y   | Y   | Y   | Y   | N   | Y   | Critically low |
| Kaliamoorthy et al. 2022 [25] | Y  | PY | N  | PY | Y  | Y  | N  | PY | PY | N   | N   | N   | N   | N   | N   | N   | Critically low |
| Romandini et al. 2021 [26]    | Y  | PY | N  | PY | Y  | Y  | Y  | Y  | Y  | N   | Y   | Y   | Y   | Y   | Y   | Y   | Moderate       |
| Larvin et al. 2021 [27]       | Y  | PY | N  | PY | Y  | Y  | N  | PY | PY | N   | Y   | N   | Y   | Y   | Y   | Y   | Low            |
| Qin et al. 2021 [28]          | Y  | N  | N  | PY | N  | N  | N  | Y  | Y  | N   | Y   | Y   | Y   | Y   | Y   | Y   | Critically low |
| Guo et al. 2021 [29]          | Y  | N  | N  | PY | Y  | Y  | Y  | Y  | PY | N   | Y   | N   | N   | Y   | Y   | Y   | Critically low |
| Alvarenga et al. 2021 [30]    | Y  | PY | N  | PY | Y  | N  | N  | Y  | Y  | N   | NA  | NA  | N   | N   | NA  | Y   | Critically low |
| Stöhr et al. 2021 [31]        | Y  | PY | N  | PY | Y  | Y  | Y  | Y  | Y  | N   | Y   | Y   | Y   | Y   | Y   | Y   | Moderate       |
| Sayeed et al. 2021 [32]       | Y  | N  | N  | PY | N  | N  | N  | PY | PY | N   | Y   | N   | Y   | Y   | N   | Y   | Critically low |
| Aragão et al. 2021 [33]       | Y  | PY | N  | PY | Y  | Y  | Y  | Y  | Y  | N   | NA  | NA  | Y   | Y   | NA  | Y   | Moderate       |
| Farook et al. 2021 [34]       | Y  | PY | N  | PY | Y  | N  | N  | Y  | PY | N   | Y   | N   | Y   | Y   | N   | Y   | Critically low |
| Wu et al. 2020 [35]           | Y  | N  | N  | PY | N  | Y  | Y  | Y  | Y  | N   | Y   | N   | Y   | Y   | Y   | Y   | Low            |
| Zhang et al. 2020 [36]        | Y  | N  | N  | PY | Y  | Y  | N  | Y  | Y  | N   | Y   | Y   | Y   | Y   | Y   | Y   | Critically low |
| Gopinath et al. 2020 [37]     | Y  | PY | N  | PY | Y  | Y  | N  | PY | Y  | N   | Y   | N   | Y   | Y   | Y   | Y   | Low            |
| Nguyen et al. 2020 [38]       | Y  | N  | N  | PY | Y  | N  | N  | Y  | PY | N   | NA  | NA  | N   | N   | NA  | Y   | Critically low |
| Gomes-Filho et al. 2020 [39]  | Y  | PY | N  | PY | Y  | Y  | N  | Y  | PY | N   | N   | Y   | Y   | Y   | Y   | Y   | Critically low |

| Study                          | Q1 | Q2 | Q3 | Q4 | Q5 | Q6 | Q7 | Q8 | Q9 | Q10 | Q11 | Q12 | Q13 | Q14 | Q15 | Q16 | All            |
|--------------------------------|----|----|----|----|----|----|----|----|----|-----|-----|-----|-----|-----|-----|-----|----------------|
| Lv et al. 2020 [40]            | Y  | N  | N  | PY | Y  | Y  | N  | Y  | Y  | N   | Y   | Y   | Y   | Y   | Y   | Y   | Critically low |
| Qiao et al. 2020 [41]          | Y  | N  | N  | PY | Y  | Y  | N  | Y  | PY | N   | Y   | N   | N   | Y   | Y   | Y   | Critically low |
| Hussain et al. 2020 [42]       | Y  | PY | N  | PY | Y  | Y  | Y  | PY | Y  | N   | N   | Y   | Y   | Y   | N   | Y   | Critically low |
| Ali et al. 2020 [43]           | Y  | PY | N  | PY | Y  | N  | Y  | Y  | PY | N   | Y   | N   | Y   | Y   | N   | N   | Low            |
| Xu et al. 2020 [44]            | Y  | N  | N  | PY | N  | Y  | N  | PY | Y  | N   | Y   | N   | N   | Y   | Y   | Y   | Critically low |
| Aguilera et al. 2020 [45]      | Y  | PY | N  | PY | Y  | N  | N  | Y  | PY | N   | Y   | Y   | N   | Y   | Y   | Y   | Critically low |
| Machado et al. 2020 [46]       | Y  | N  | N  | PY | Y  | Y  | Y  | PY | Y  | Y   | Y   | Y   | Y   | Y   | N   | Y   | Critically low |
| Gobin et al. 2020 [47]         | Y  | N  | N  | PY | N  | Y  | N  | Y  | PY | N   | Y   | N   | N   | Y   | Y   | Y   | Critically low |
| Lorenzo-Pouso et al. 2020 [48] | Y  | N  | N  | PY | Y  | Y  | N  | Y  | Y  | N   | Y   | N   | N   | Y   | Y   | Y   | Critically low |
| Ma et al. 2020 [49]            | Y  | N  | N  | PY | Y  | N  | N  | PY | Y  | N   | Y   | Y   | Y   | Y   | N   | Y   | Critically low |
| Wu et al. 2020 [50]            | Y  | PY | N  | PY | Y  | Y  | N  | PY | Y  | N   | Y   | Y   | Y   | Y   | Y   | Y   | Low            |
| Kapellas et al. 2019 [51]      | Y  | PY | N  | PY | Y  | N  | N  | Y  | Y  | N   | Y   | Y   | N   | Y   | Y   | Y   | Critically low |
| Ferreira et al. 2018 [52]      | Y  | PY | N  | PY | Y  | N  | N  | Y  | Y  | N   | Y   | Y   | Y   | Y   | Y   | Y   | Low            |
| Xie et al. 2018 [53]           | Y  | N  | N  | PY | N  | Y  | Y  | PY | N  | N   | Y   | N   | N   | Y   | N   | Y   | Critically low |
| Corbella et al. 2018 [54]      | Y  | PY | N  | PY | Y  | Y  | Y  | Y  | PY | N   | Y   | Y   | Y   | Y   | N   | Y   | Low            |
| Leira et al. 2017 [55]         | Y  | PY | N  | PY | Y  | Y  | N  | Y  | N  | N   | Y   | N   | N   | Y   | N   | Y   | Critically low |
| Maisonneuve et al. 2017 [56]   | Y  | N  | N  | N  | Y  | Y  | N  | Y  | N  | N   | Y   | N   | N   | Y   | Y   | Y   | Critically low |
| Zeng et al. 2016 [57]          | Y  | N  | N  | PY | Y  | Y  | N  | Y  | N  | N   | Y   | N   | N   | Y   | Y   | Y   | Critically low |

Q1 – Q16 16 evaluation items of modified version of A Measurement Tool to Assess Systematic Reviews 2, <sup>a,b</sup> Different studies published by the same author in the same year, Y Yes, N No, PY Partial Yes, NA No meta-analysis conducted

1. Chen H, Li J. Association between periodontitis and its treatment on mortality rates of end-stage renal disease: a systematic review and meta-analysis. *Med Oral Patol Oral Cir Bucal*. 2024;29(3):e334-42.
2. Dewan M, Pandit AK, Goyal L. Association of periodontitis and gingivitis with stroke: a systematic review and meta-analysis. *Dent Med Probl*. 2024;61(3):407-15.
3. Ma W, Zou Z, Yang L, Lin D, Guo J, Shan Z, et al. Exploring the bi-directional relationship between periodontitis and dyslipidemia: a comprehensive systematic review and meta-analysis. *BMC Oral Health*. 2024;24(1):508.
4. Aguiar FJN, Menezes FDS, Fagundes MA, Fernandes GA, Alves FA, Filho JG, et al. Gastric adenocarcinoma and periodontal disease: a systematic review and meta-analysis. *Clinics (Sao Paulo)*. 2024;79:100321.
5. Li Y, Xiang Y, Ren H, Zhang C, Hu Z, Leng W, et al. Association between periodontitis and dental caries: a systematic review and meta-analysis. *Clin Oral Investig*. 2024;28(6):306.
6. Lin J, Pathak JL, Shen Y, Mashrah MA, Zhong X, Chen J, et al. Association between periodontitis and mild cognitive impairment: a systematic review and meta-analysis. *Dement Geriatr Cogn Disord*. 2024;53(1):37-46.
7. Ma Y, Tuerxun N, Maimaitili G. Periodontitis and the risk of oral cancer: a meta-analysis of case-control studies. *Acta Odontol Scand*. 2024;83:40478.
8. Wang N, Li C, Zhang J, Wang L, Yang J. The association between halitosis and periodontitis: a systematic review and meta-analysis. *Clin Oral Investig*. 2024;28(6):341.
9. Rosário-Dos-Santos HL, Miranda SS, Gomes-Filho IS, Cruz SSD, Figueiredo A, Souza ES, et al. Periodontitis severity relationship with metabolic syndrome: a systematic review with meta-analysis. *Oral Dis*. 2023;29(7):2512-20.
10. Leelaviwat N, Kewcharoen J, Poomprakobsri K, Trongtorsak A, Del Rio-Pertuz G, Abdelnabi M, et al. Periodontal disease and risk of atrial fibrillation or atrial flutter: a systematic review and meta-analysis. *J Arrhythm*. 2023;39(6):992-6.
11. Larvin H, Gao C, Kang J, Aggarwal VR, Pavitt S, Wu J. The impact of study factors in the association of periodontal disease and cognitive disorders: systematic review and meta-analysis. *Age Ageing*. 2023;52(2):afad015.
12. Molina A, Huck O, Herrera D, Montero E. The association between respiratory diseases and periodontitis: a systematic review and meta-analysis. *J Clin Periodontol*. 2023;50(6):842-87.
13. Larvin H, Kang J, Aggarwal VR, Pavitt S, Wu J. Periodontitis and risk of immune-mediated systemic conditions: a systematic review and meta-analysis. *Community Dent Oral Epidemiol*. 2023;51(5):705-17.

14. Ortíz de Urbina Comerón P, Zubizarreta-Macho Á, Lobo Galindo AB, Montiel-Company JM, Lorenzo-Gomez MF, Flores Fraile J. Relationship between prostate inflammation and periodontal disease-a systematic review and meta-analysis. *J Clin Med.* 2023;12(18):6070.
15. Yang M, Peng R, Li X, Peng J, Liu L, Chen L. Association between chronic obstructive pulmonary disease and periodontal disease: a systematic review and meta-analysis. *BMJ Open.* 2023;13(6):e067432.
16. Guo X, Li X, Liao C, Feng X, He T. Periodontal disease and subsequent risk of cardiovascular outcome and all-cause mortality: a meta-analysis of prospective studies. *PLoS One.* 2023;18(9):e0290545.
17. Xu F, Tang J. Is there an association between periodontitis and non-alcoholic fatty liver disease? A systematic review and meta-analysis. *Community Dent Health.* 2023;40(1):47-52.
18. Karimi N, Samiee N, Moradi Y. The association between periodontal disease and risk of adverse maternal or neonatal outcomes: a systematic review and meta-analysis of analytical observational studies. *Health Sci Rep.* 2023;6(10):e1630.
19. Khodadadi N, Khodadadi M, Zamani M. Is periodontitis associated with obstructive sleep apnea? A systematic review and meta-analysis. *J Clin Exp Dent.* 2022;14(4):e359-65.
20. Zhang Y, Feng W, Li J, Cui L, Chen ZJ. Periodontal disease and adverse neonatal outcomes: a systematic review and meta-analysis. *Front Pediatr.* 2022;10:799740.
21. Zhang X, Gu H, Xie S, Su Y. Periodontitis in patients with psoriasis: a systematic review and meta-analysis. *Oral Dis.* 2022;28(1):33-43.
22. Wang K, Zhang Z, Wang Z. Assessment of the association between periodontal disease and total cancer incidence and mortality: a meta-analysis. *PeerJ.* 2022;10:e14320.
23. Li W, Wang S, He Y, Zhang Y, Lin S, Cen D, et al. Is periodontal disease a risk indicator for urogenital cancer? A systematic review and meta-analysis of cohort studies. *Front Oncol.* 2022;12:697399.
24. Kesharani P, Kansara P, Kansara T, Kini A, Bhat R, Shetty P, et al. Is periodontitis a risk factor for lung cancer? A meta-analysis and detailed review of mechanisms of association. *Contemp Clin Dent.* 2022;13(4):297-306.
25. Kaliamoorthy S, Nagarajan M, Sethuraman V, Jayavel K, Lakshmanan V, Palla S. Association of Alzheimer's disease and periodontitis - a systematic review and meta-analysis of evidence from observational studies. *Med Pharm Rep.* 2022;95(2):144-51.
26. Romandini M, Baima G, Antonoglou G, Bueno J, Figuero E, Sanz M. Periodontitis, edentulism, and risk of mortality: a systematic review with meta-analyses. *J Dent Res.* 2021;100(1):37-49.
27. Larvin H, Kang J, Aggarwal VR, Pavitt S, Wu J. Risk of incident cardiovascular disease in people with periodontal disease: a systematic review and meta-analysis. *Clin Exp Dent Res.* 2021;7(1):109-22.
28. Qin X, Zhao Y, Guo Y. Periodontal disease and myocardial infarction risk: a meta-analysis of cohort studies. *Am J Emerg Med.* 2021;48:103-9.



29. Guo H, Chang S, Pi X, Hua F, Jiang H, Liu C, et al. The effect of periodontitis on dementia and cognitive impairment: a meta-analysis. *Int J Environ Res Public Health*. 2021;18(13):6823.
30. Alvarenga MOP, Miranda GHN, Ferreira RO, Saito MT, Fagundes NCF, Maia LC, et al. Association between diabetic retinopathy and periodontitis-a systematic review. *Front Public Health*. 2021;8:550614.
31. Stöhr J, Barbaresko J, Neuenschwander M, Schlesinger S. Bidirectional association between periodontal disease and diabetes mellitus: a systematic review and meta-analysis of cohort studies. *Sci Rep*. 2021;11(1):13686.
32. Sayeed G, Varghese SS. Association between periodontitis and metabolic syndrome in females: a systematic review and meta-analysis. *J Int Soc Prev Community Dent*. 2021;11(6):609-25.
33. Aragão WAB, Souza-Monteiro D, Frazão DR, Ne YGS, Ferreira RO, Rivera LFS, et al. Is there any association between chronic periodontitis and anxiety in adults? A systematic review. *Front Psychiatry*. 2021;12:710606.
34. Farook F, Al Meshrafi A, Mohamed Nizam N, Al Shammari A. The association between periodontitis and erectile dysfunction: a systematic review and meta-analysis. *Am J Mens Health*. 2021;15(3):15579883211007277.
35. Wu Y, Shi X, Li Y, Shi X, Gu Y, Qian Q, et al. Hematopoietic and lymphatic cancers in patients with periodontitis: a systematic review and meta-analysis. *Med Oral Patol Oral Cir Bucal*. 2020;25(1):e21-8.
36. Zhang Y, Sun C, Song EJ, Liang M, Shi T, Min M, et al. Is periodontitis a risk indicator for gastrointestinal cancers? A meta-analysis of cohort studies. *J Clin Periodontol*. 2020;47(2):134-47.
37. Gopinath D, Kunnath Menon R, Veettil SK, George Botelho M, Johnson NW. Periodontal diseases as putative risk factors for head and neck cancer: systematic review and meta-analysis. *Cancers (Basel)*. 2020;12(7):1893.
38. Nguyen ATM, Akhter R, Garde S, Scott C, Twigg SM, Colagiuri S, et al. The association of periodontal disease with the complications of diabetes mellitus. A systematic review. *Diabetes Res Clin Pract*. 2020;165:108244.
39. Gomes-Filho IS, Cruz SSD, Trindade SC, Passos-Soares JS, Carvalho-Filho PC, Figueiredo A, et al. Periodontitis and respiratory diseases: a systematic review with meta-analysis. *Oral Dis*. 2020;26(2):439-46.
40. Lv X, Li W, Fang Z, Xue X, Pan C. Periodontal disease and age-related macular degeneration: a meta-analysis of 112,240 participants. *Biomed Res Int*. 2020;2020:4753645.
41. Qiao Y, Wang Z, Li Y, Han Y, Zhou Y, Cao X. Rheumatoid arthritis risk in periodontitis patients: a systematic review and meta-analysis. *Joint Bone Spine*. 2020;87(6):556-64.
42. Hussain SB, Botelho J, Machado V, Zehra SA, Mendes JJ, Ciurtin C, et al. Is there a bidirectional association between rheumatoid arthritis and periodontitis? A systematic review and meta-analysis. *Semin Arthritis Rheum*. 2020;50(3):414-22.

43. Ali A, Lassi ZS, Kapellas K, Jamieson L, Rumbold AR. A systematic review and meta-analysis of the association between periodontitis and oral high-risk human papillomavirus infection. *J Public Health (Oxf)*. 2020;43(4):e610-9.
44. Xu J, Duan X. Association between periodontitis and hyperlipidaemia: a systematic review and meta-analysis. *Clin Exp Pharmacol Physiol*. 2020;47(11):1861-73.
45. Muñoz Aguilera E, Suvan J, Buti J, Czesnikiewicz-Guzik M, Barbosa Ribeiro A, Orlandi M, et al. Periodontitis is associated with hypertension: a systematic review and meta-analysis. *Cardiovasc Res*. 2020;116(1):28-39.
46. Machado V, Escalda C, Proença L, Mendes JJ, Botelho J. Is there a bidirectional association between polycystic ovarian syndrome and periodontitis? A systematic review and meta-analysis. *J Clin Med*. 2020;9(6):1961.
47. Gobin R, Tian D, Liu Q, Wang J. Periodontal diseases and the risk of metabolic syndrome: an updated systematic review and meta-analysis. *Front Endocrinol (Lausanne)*. 2020;11:336.
48. Lorenzo-Pouso AI, Castelo-Baz P, Rodriguez-Zorrilla S, Pérez-Sayáns M, Vega P. Association between periodontal disease and inflammatory bowel disease: a systematic review and meta-analysis. *Acta Odontol Scand*. 2020;79(5):344-53.
49. Ma H, Zheng J, Li X. Potential risk of certain cancers among patients with periodontitis: a supplementary meta-analysis of a large-scale population. *Int J Med Sci*. 2020;17(16):2531-43.
50. Wu CZ, Yuan YH, Liu HH, Li SS, Zhang BW, Chen W, et al. Epidemiologic relationship between periodontitis and type 2 diabetes mellitus. *BMC Oral Health*. 2020;20(1):204.
51. Kapellas K, Singh A, Bertotti M, Nascimento GG, Jamieson LM, Perio CKDc. Periodontal and chronic kidney disease association: a systematic review and meta-analysis. *Nephrology (Carlton)*. 2019;24(2):202-12.
52. Ferreira SD, Martins CC, Amaral SA, Vieira TR, Albuquerque BN, Cota LOM, et al. Periodontitis as a risk factor for peri-implantitis: systematic review and meta-analysis of observational studies. *J Dent*. 2018;79:1-10.
53. Xie WZ, Jin YH, Leng WD, Wang XH, Zeng XT, investigators B. Periodontal disease and risk of bladder cancer: a meta-analysis of 298476 participants. *Front Physiol*. 2018;9:979.
54. Corbella S, Veronesi P, Galimberti V, Weinstein R, Del Fabbro M, Francetti L. Is periodontitis a risk indicator for cancer? A meta-analysis. *PLoS One*. 2018;13(4):e0195683.
55. Leira Y, Seoane J, Blanco M, Rodriguez-Yanez M, Takkouche B, Blanco J, et al. Association between periodontitis and ischemic stroke: a systematic review and meta-analysis. *Eur J Epidemiol*. 2017;32(1):43-53.

56. Maisonneuve P, Amar S, Lowenfels AB. Periodontal disease, edentulism, and pancreatic cancer: a meta-analysis. *Ann Oncol.* 2017;28(5):985-95.
57. Zeng XT, Leng WD, Lam YY, Yan BP, Wei XM, Weng H, et al. Periodontal disease and carotid atherosclerosis: a meta-analysis of 17,330 participants. *Int J Cardiol.* 2016;203:1044-51.
